# Supplementary material for: Comparing the Quality of Primary Care between Public and Private Providers in Urban China: A Standardized Patient Study
Source: MDPI journal article supplement (doi:10.3390/ijerph18105060), 2021-05-11
Supplement: s1 [file s1]

**Table S1.** Checklist of unstable angina and asthma.

| Unstable angina                                                                                                                                                                                                                                    | Asthma                                                                                                                                                           |
|----------------------------------------------------------------------------------------------------------------------------------------------------------------------------------------------------------------------------------------------------|------------------------------------------------------------------------------------------------------------------------------------------------------------------|
| <ul style="list-style-type: none"> <li>• Pain location</li> <li>• Type of pain</li> <li>• Shortness of breath</li> <li>• Pain radiation</li> </ul>                                                                                                 | <ul style="list-style-type: none"> <li>• Onset of problem</li> <li>• Cough</li> <li>• Trigger</li> <li>• Constant or episodic</li> <li>• Duration</li> </ul>     |
| <ul style="list-style-type: none"> <li>• Age</li> <li>• Pain start time (this episode)</li> <li>• Similar pain previously</li> <li>• When started having pain previously</li> <li>• Pain severity</li> <li>• Activity when pain started</li> </ul> | <ul style="list-style-type: none"> <li>• Age</li> <li>• When started having difficulty breathing</li> <li>• Problem in childhood</li> <li>• Frequency</li> </ul> |
| <ul style="list-style-type: none"> <li>• Smoking</li> <li>• Drinking alcohol</li> <li>• Family history</li> </ul>                                                                                                                                  | <ul style="list-style-type: none"> <li>• Smoking</li> <li>• Family history</li> </ul>                                                                            |
| <ul style="list-style-type: none"> <li>• Sweating</li> <li>• Nausea</li> <li>• Acid reflux or stomach</li> <li>• Constipation</li> <li>• Normal stool</li> <li>• Diarrhea</li> </ul>                                                               | <ul style="list-style-type: none"> <li>• Expectoration</li> <li>• Fever</li> <li>• Chest pain</li> <li>• Weight loss</li> <li>• Sweating</li> </ul>              |
| <ul style="list-style-type: none"> <li>• Blood pressure</li> <li>• Pulse</li> <li>• Auscultation</li> <li>• Temperature</li> </ul>                                                                                                                 | <ul style="list-style-type: none"> <li>• Auscultation</li> <li>• Blood pressure</li> <li>• Pulse</li> <li>• Temperature</li> </ul>                               |
| <ul style="list-style-type: none"> <li>• Electrocardiogram</li> </ul>                                                                                                                                                                              | -                                                                                                                                                                |

**Table S2.** Evaluation criteria for Unstable Angina and Asthma.

|                              | Unstable Angina                                                                                                                                                                                                                                                                                                                                                                                                                                                                                                                                                                    | Asthma                                                                                                                                                                                                                                                                                                                 |
|------------------------------|------------------------------------------------------------------------------------------------------------------------------------------------------------------------------------------------------------------------------------------------------------------------------------------------------------------------------------------------------------------------------------------------------------------------------------------------------------------------------------------------------------------------------------------------------------------------------------|------------------------------------------------------------------------------------------------------------------------------------------------------------------------------------------------------------------------------------------------------------------------------------------------------------------------|
| Adherence to the checklist   | 1. The proportion of recommended questions asked in the checklists<br>(1) The proportion of essential questions asked in the checklists<br>(2) The proportion of important questions asked in the checklists<br>(3) The proportion of risk factors asked in the checklists<br>(4) The proportion of accompanying symptoms asked in the checklists<br>2. The proportion of recommended examinations asked in the checklists<br>(1) The proportion of physical examinations performed in the checklists<br>(2) The proportion of laboratory examinations performed in the checklists |                                                                                                                                                                                                                                                                                                                        |
| Accuracy of diagnosis        | 1. Correct diagnosis<br>Angina; Myocardial infarction<br>2. Partially correct diagnosis<br>Heart disease<br>3. Incorrect diagnosis (provided by primary care providers)<br>Myocardial ischemia, neuralgia, menopausal syndrome, myocarditis, cervical spondylosis, chest congestion, swelling in chest.                                                                                                                                                                                                                                                                            | 1. Correct diagnosis<br>Asthma<br>2. Partially correct diagnosis<br>Allergies; Breathing problem<br>3. Incorrect diagnosis<br>(provided by primary care providers)<br>Heart disease, cold, coronary heart disease, respiratory infection, myocardial ischemia, acute pharyngitis, mycoplasma infection.                |
| Appropriateness of treatment | 1. Correct treatment<br>Aspirin, clopidogrel/ or other anti-platelet agents, referral.<br>2. Unnecessary or harmful (provided by providers)<br>Antibiotics, ginkgo oral liquid, Naoxintong capsule, oral electrolyte solution, psychiatric medication, theophylline                                                                                                                                                                                                                                                                                                                | 1. Correct treatment<br>Bronchodilators, theophylline, inhaled or oral corticosteroids, leukotriene inhibitors, inhaled anticholinergic<br>2. Unnecessary or harmful (provided by providers)<br>Aspirin, compound liquorice tablet, erythromycin, lung-nourishing semifluid extract, ginkgo oral liquid, cephalosporin |

**Table S3.** Scoring methods of PCC.

| PCC                                                |                                                                                        | Scoring                                                                                                                | Source         |
|----------------------------------------------------|----------------------------------------------------------------------------------------|------------------------------------------------------------------------------------------------------------------------|----------------|
| <i>1. Exploring disease and illness experience</i> |                                                                                        |                                                                                                                        |                |
| <i>1.1 Exploring disease experience</i>            |                                                                                        |                                                                                                                        |                |
| 1.1.1                                              | Number of recommended questions asked                                                  | 1 if physician asked the recommended question, 0 otherwise. Calculate the total score of all the recommended items.    | SP checklist   |
| 1.1.2                                              | Number of recommended exams performed                                                  | 1 if physician preformed the recommended exam, 0 otherwise. Calculate the total score of all the recommended items.    | SP checklist   |
| 1.1.3                                              | Number of essential questions asked                                                    | 2 if physician asked the essential question, 0 otherwise. Calculate the total score of all the essential items.        | SP checklist   |
| 1.1.4                                              | Number of essential exams performed                                                    | 2 if physician preformed the essential exam, 0 otherwise. Calculate the total score of all the essential items.        | SP checklist   |
| <i>1.2 Exploring illness experience</i>            |                                                                                        |                                                                                                                        |                |
| 1.2.1                                              | The physician made you feel free that you were willing to show your symptoms and fears | Using 5-point Likert scale (e.g. strongly agree, agree, uncertain, disagree, strongly disagree); ranging from 5 to 1.  | SP exit survey |
| <i>2. Understanding the whole person</i>           |                                                                                        |                                                                                                                        |                |
| 2.1                                                | Area of family                                                                         | 1 if physician asked area of family, 0 otherwise.                                                                      | SP checklist   |
| 2.2                                                | Family history                                                                         | 1 if physician asked family history, 0 otherwise.                                                                      | SP checklist   |
| 2.3                                                | Employment                                                                             | 1 if physician asked employment, 0 otherwise.                                                                          | SP checklist   |
| <i>3. Finding the common ground</i>                |                                                                                        |                                                                                                                        |                |
| 3.1                                                | You agreed with the physician's opinion about the problem                              | Using 5-point Likert scale (e.g., strongly agree, agree, uncertain, disagree, strongly disagree); ranging from 5 to 1. | SP exit survey |
| 3.2                                                | The physician fully explained this problem to you                                      | Using 5-point Likert scale (e.g., strongly agree, agree, uncertain, disagree, strongly disagree); ranging from 5 to 1. | SP exit survey |
| 3.3                                                | The physician fully explained the treatment plan to you                                | Using 5-point Likert scale (e.g., strongly agree, agree, uncertain, disagree, strongly disagree); ranging from 5 to 1. | SP exit survey |
| 3.4                                                | Whether the physician gave advice to discuss your roles in disease management          | 1 if physician gave advice to discuss patient's roles in disease management, 0 otherwise.                              | SP exit survey |
| 3.5                                                | Overall, do you like this physician                                                    | 1 if patient likes this physician, 0 otherwise.                                                                        | SP exit survey |
